# Supplementary material
Source: Springer Nature journal article supplement (https://www.springermedizin.de/resource/supplementary/12974_2011_493_MOESM1_ESM.pdf/9601346)

(A) Experimental schedule of Fig. 2 - 6.

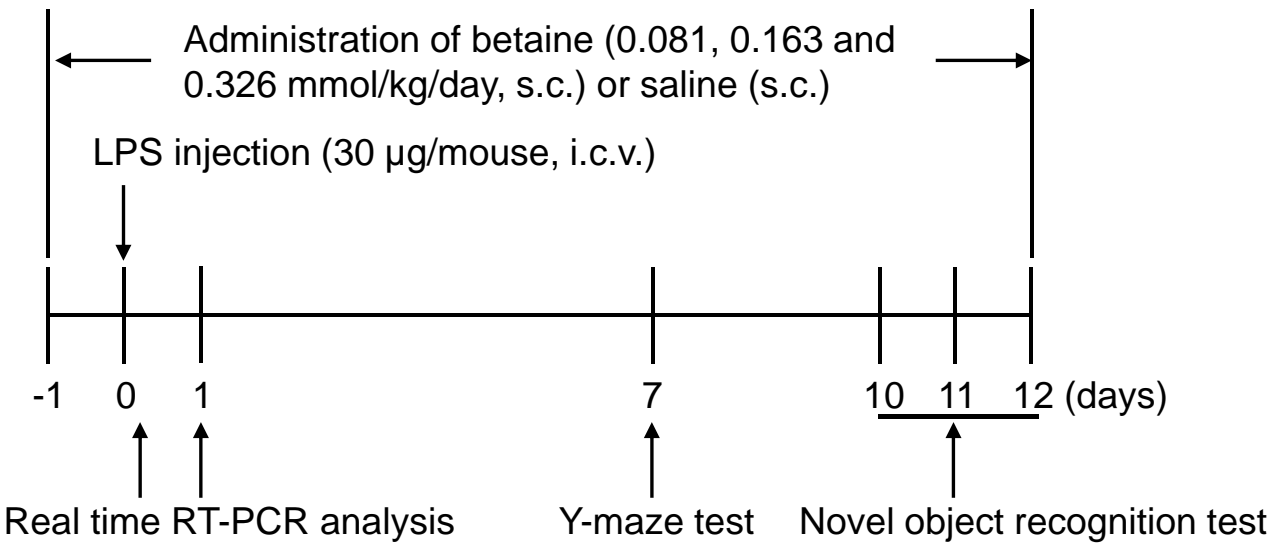

(B) Experimental schedule of Fig. 7.

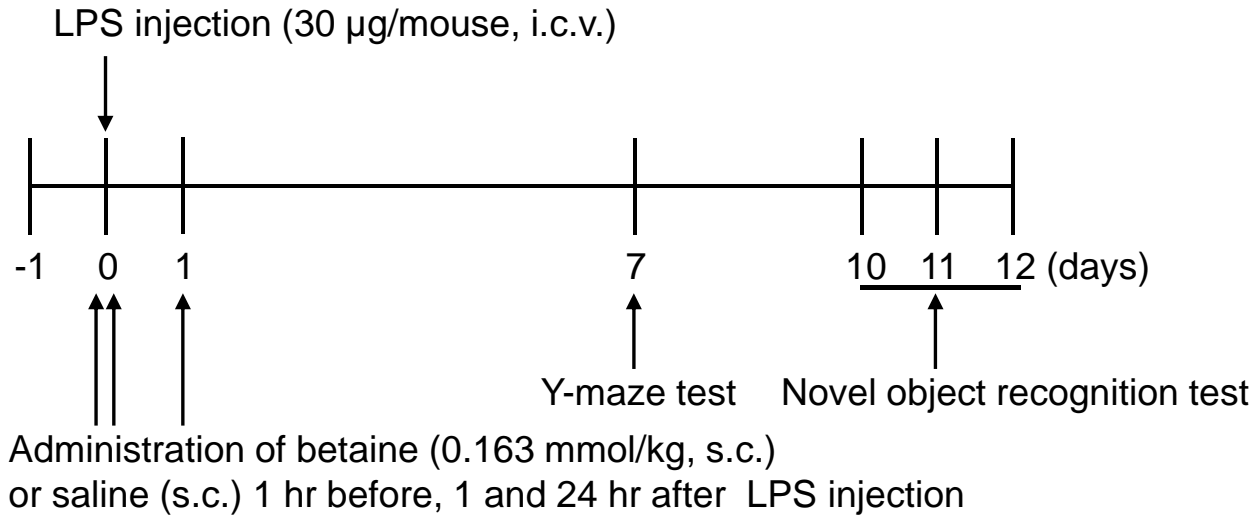

(C) Experimental schedule of Fig. 8.

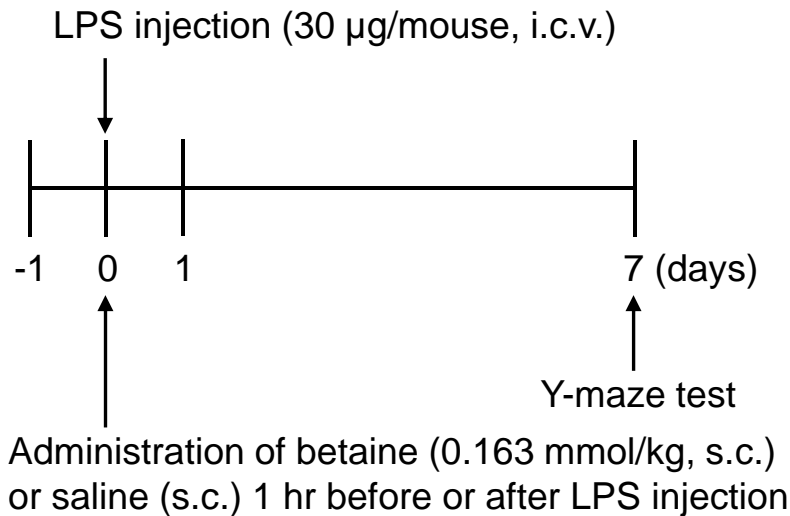

Supplement: MOESM1 [file 9601346]
